# Supplementary material for: Compound sophora decoction alleviates ulcerative colitis by regulating macrophage polarization through cGAS inhibition: network pharmacology and experimental validation
Source: PubMed Central journal article supplement (PMC11087132; doi:10.18632/aging.205734), 2024-04-10
Supplement: aging-16-205734-s001.pdf [file aging-16-205734-s001.pdf]

## SUPPLEMENTARY FIGURE

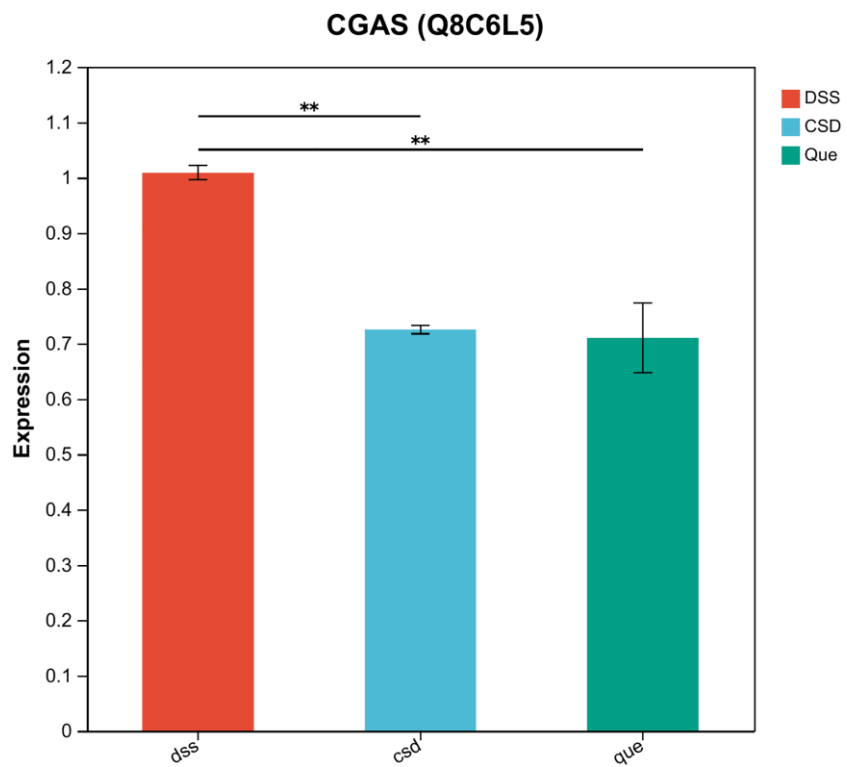

**Supplementary Figure 1. Protein transcriptomics showed that both CSD and quercetin could significantly down-regulate cGAS protein in intestinal tissue of DSS induced UC mice. The results are mean ± SD, \*\* $p < 0.01$  vs. DSS group.**
