# Supplementary material for: Compound sophora decoction alleviates ulcerative colitis by regulating macrophage polarization through cGAS inhibition: network pharmacology and experimental validation
Source: PubMed Central journal article supplement (PMC11087132; doi:10.18632/aging.205734), 2024-04-10
Supplement: aging-16-205734-s002.pdf [file aging-16-205734-s002.pdf]

## SUPPLEMENTARY TABLES

**Supplementary Table 1. mRNA primers.**

| Gene    |         | Primer Sequences (5'–3') |
|---------|---------|--------------------------|
| ISD     | Forward | TACAGATCTACTAGTGATCTATG  |
|         | Reverse | ACTGATCTGTACATGATCTACA   |
| cGAS    | Forward | TTCCACGAGGAAATCCGCTGAG   |
|         | Reverse | CAGCAGGGCTTCCTGGTTTTTC   |
| iNOS    | Forward | GAAGAAAACCCCTTGTGCTG     |
|         | Reverse | TCCAGGGATTCTGGAACATT     |
| Arg1    | Forward | CTTGGCTTGCTTCGGAACTC     |
|         | Reverse | GGAGAAGGCGTTTGCTTAGTTC   |
| IFN-β   | Forward | CTAACTGCAACCTTTCGAAGC    |
|         | Reverse | CTAGTGTCCCTTTCATATGCAG   |
| CCL17   | Forward | CGAGAGTGCTGCCTGGATTACT   |
|         | Reverse | GGTCTGCACAGATGAGCTTGCC   |
| IL10    | Forward | GCTCTTACTGACTGGCATGAG    |
|         | Reverse | CGCAGCTCTAGGAGCATGTG     |
| TNF-α   | Forward | TACTGAACTTCGGGGTGATCG    |
|         | Reverse | TCCTCCACTTGGTGGTTTTGC    |
| CXCL10  | Forward | CCAAGTGCTGCCGTCATTTTC    |
|         | Reverse | TCCCTATGGCCCTCATTCTCA    |
| β-actin | Forward | AGACTTCGAGCAGGAGATGG     |
|         | Reverse | GCACTGTGTTGGCATAGAGG     |

**Supplementary Table 2. Active components of CSD.**

| Mol ID    | Molecule name                                    | The drugs in CSD                                                                                                                               | OB (%) | DL   |
|-----------|--------------------------------------------------|------------------------------------------------------------------------------------------------------------------------------------------------|--------|------|
| MOL000098 | quercetin                                        | <i>Sophora flavescens</i> Aiton, <i>Sanguisorba officinalis</i> L., <i>Panax notoginseng</i> (Burkill) F.H. Chen, <i>Glycyrrhiza glabra</i> L. | 46.43  | 0.28 |
| MOL000358 | beta-sitosterol                                  | <i>Sanguisorba officinalis</i> L., <i>Baphicacanthus cusia</i> (Nees) Bremek., <i>Panax notoginseng</i> (Burkill) F.H. Chen                    | 36.91  | 0.75 |
| MOL000422 | kaempferol                                       | <i>Sanguisorba officinalis</i> L., <i>Glycyrrhiza glabra</i> L.                                                                                | 41.88  | 0.24 |
| MOL001484 | Inermine                                         | <i>Sophora flavescens</i> Aiton, <i>Glycyrrhiza glabra</i> L.                                                                                  | 75.18  | 0.54 |
| MOL004941 | (2R)-7-hydroxy-2-(4-hydroxyphenyl) chroman-4-one | <i>Sophora flavescens</i> Aiton, <i>Glycyrrhiza glabra</i> L.                                                                                  | 71.12  | 0.18 |
| MOL000392 | formononetin                                     | <i>Sophora flavescens</i> Aiton, <i>Glycyrrhiza glabra</i> L.                                                                                  | 69.67  | 0.21 |
| MOL000211 | Mairin                                           | <i>Sanguisorba officinalis</i> L., <i>Glycyrrhiza glabra</i> L.                                                                                | 55.38  | 0.78 |
| MOL001792 | DFV                                              | <i>Panax notoginseng</i> (Burkill) F.H. Chen, <i>Glycyrrhiza glabra</i> L.                                                                     | 32.76  | 0.18 |
